# Supplementary material
Source: PubMed Central journal article supplement (PMC8494644)

**Supplementary information**

---

**Phenotypic variation of transcriptomic cell types in mouse motor cortex**

---

In the format provided by the authors and unedited

Lamp5 Pax6

Lamp5 Egl3\_1

Lamp5 Egl3\_2

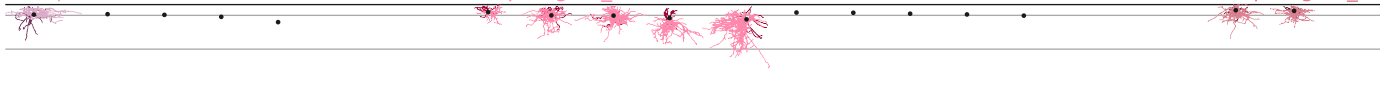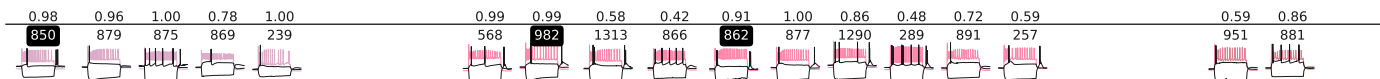

Lamp5 Pdlim5\_1

Lamp5 Pdlim5\_2

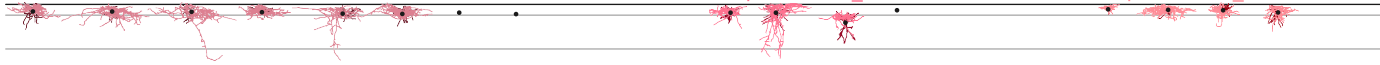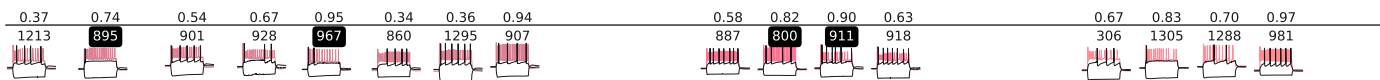

Lamp5 Slc35d3

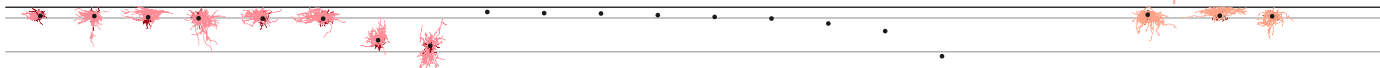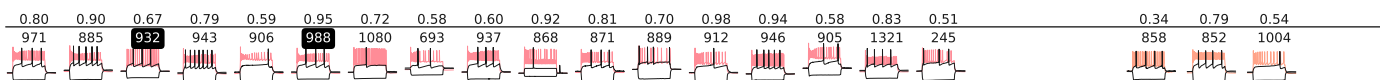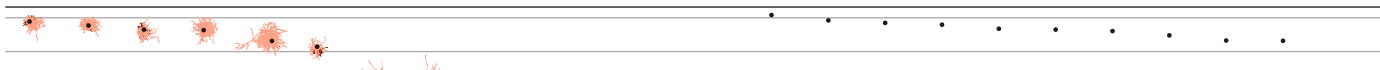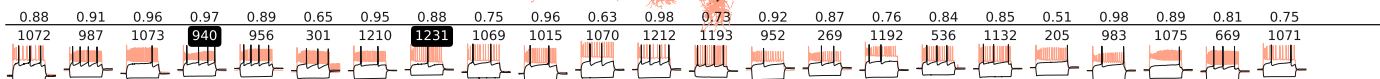

Lamp5 Lhx6

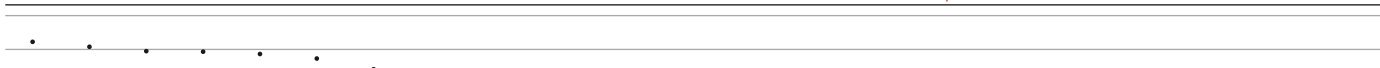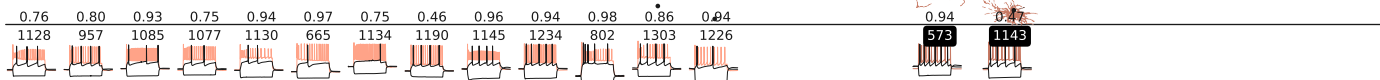

Sncg Col14a1

Sncg Calb1\_1

Sncg Calb1\_2

Sncg Npy2r

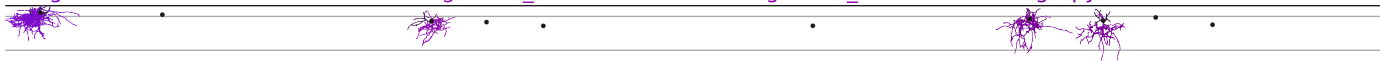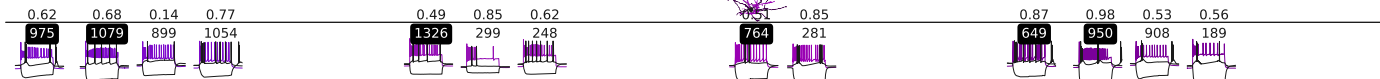

Vip Sncg

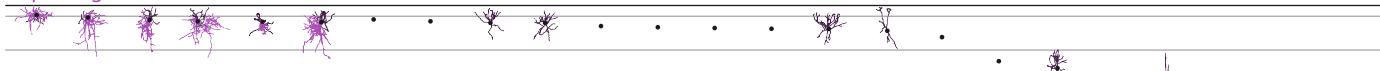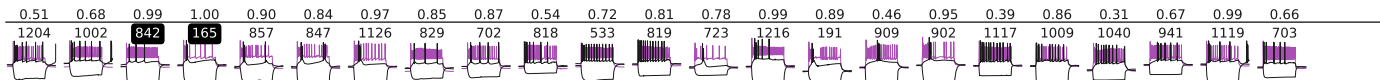

Vip Serpinf1\_1

Vip Serpinf1\_2

Vip Serpinf1\_3

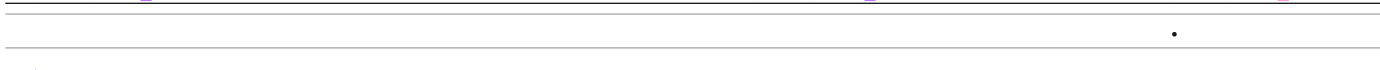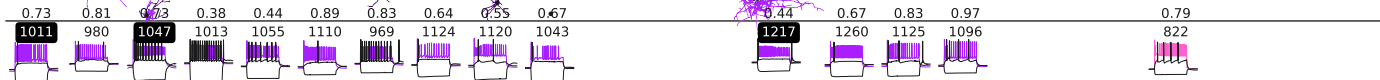

Vip Htr1f

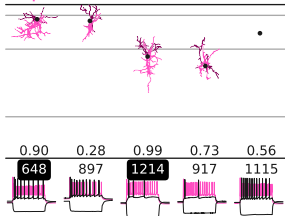

Vip Gpc3

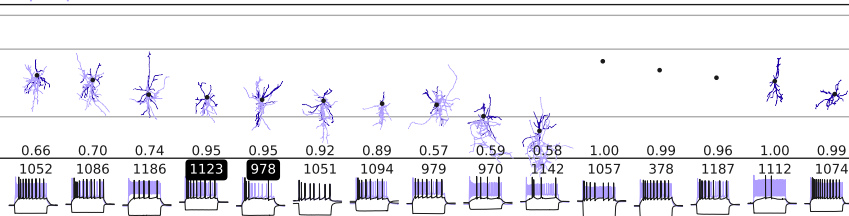

Vip C1ql1

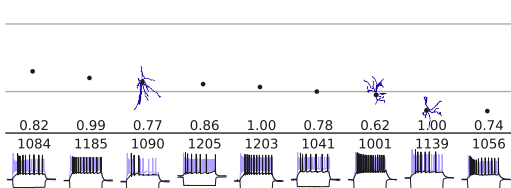

Vip Mybpc1\_2

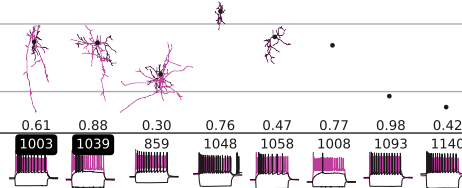

Vip Mybpc1\_1

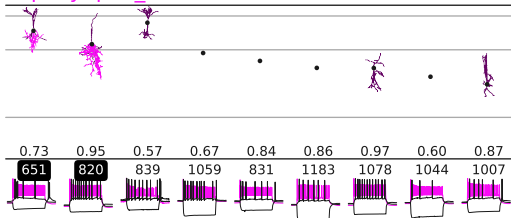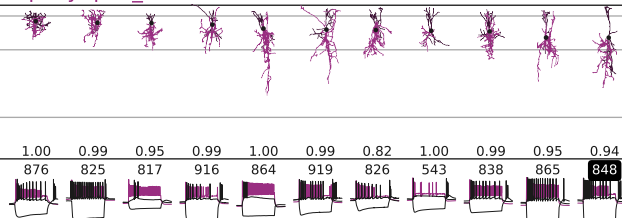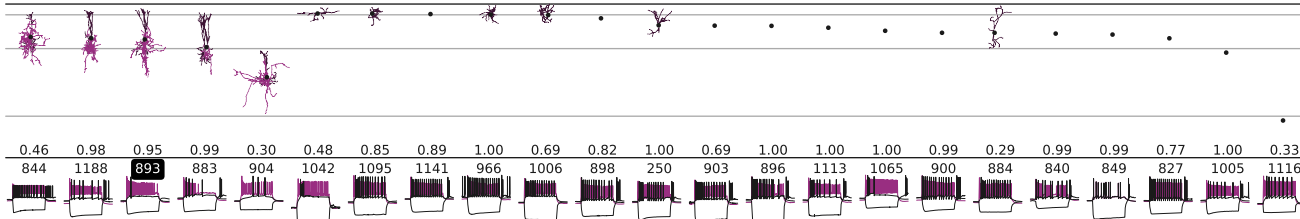

Vip Mybpc1\_3

Vip Chat\_1

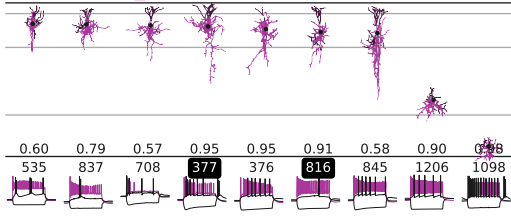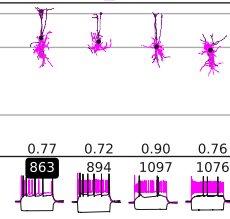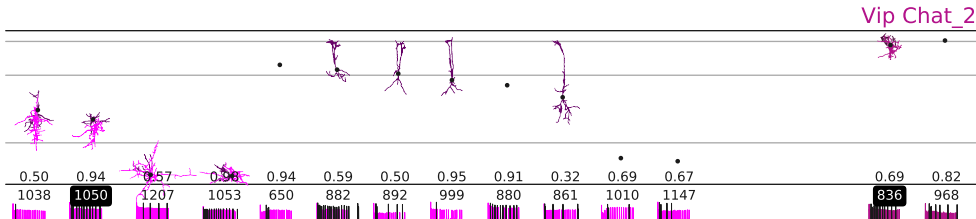

Vip Chat\_2

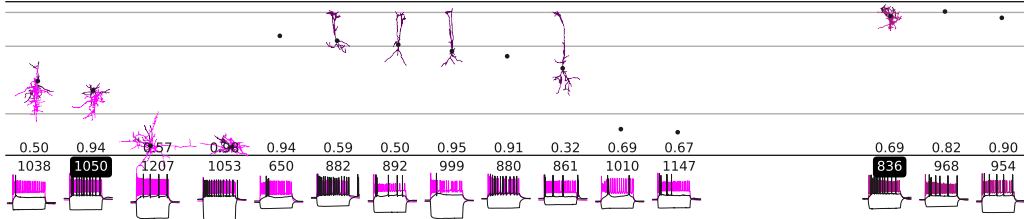

Sst Chodl

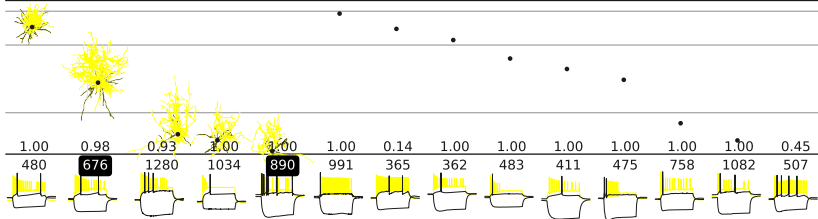

Sst Myh8\_1

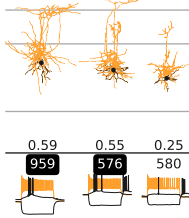

Sst Penk

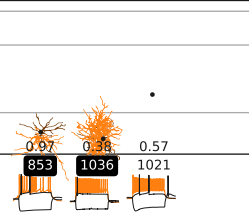

Sst Myh8\_2

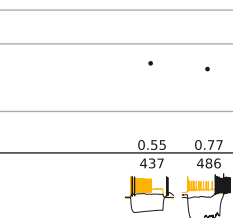

Sst Myh8\_3

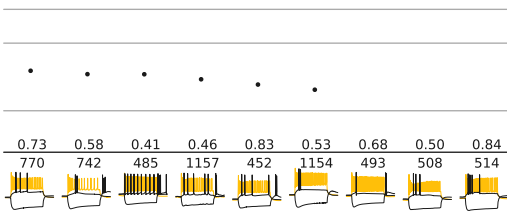

Sst Htr1a

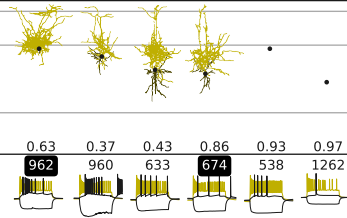

Sst Etv1

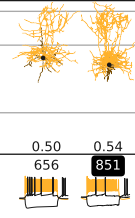

Sst Pvalb Etv1

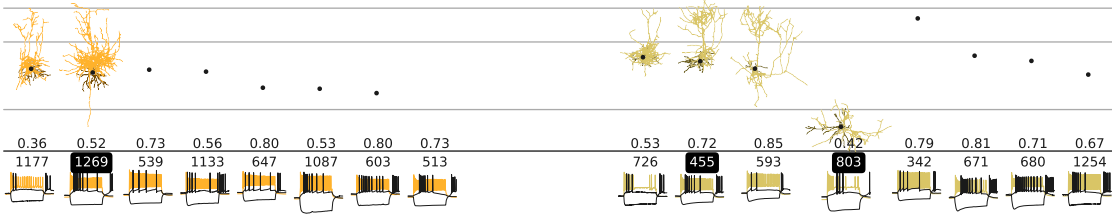

Sst Crhr2\_1

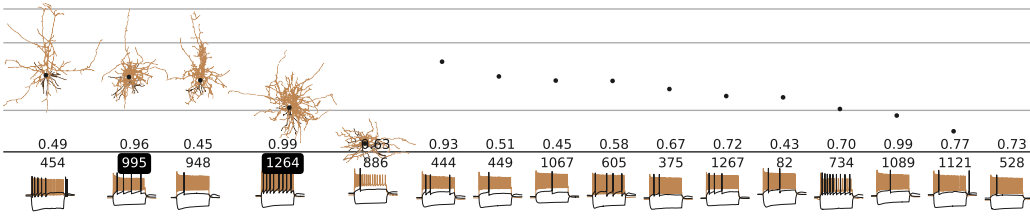

Sst Crhr2\_2

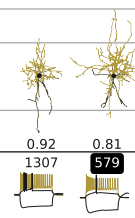

Sst Hpse

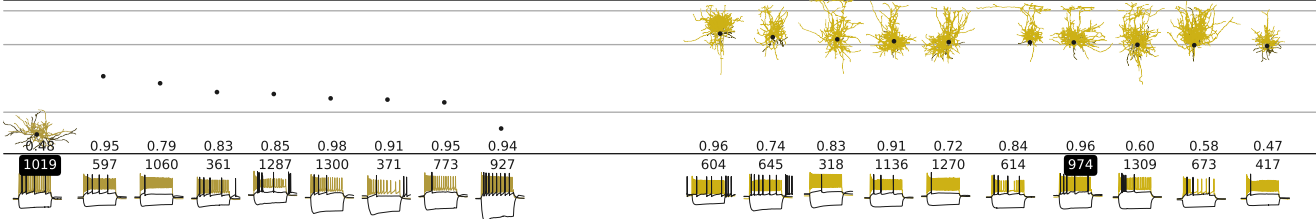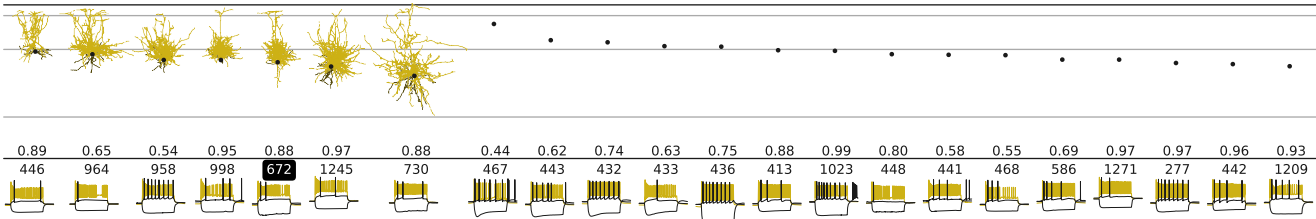

Sst Calb2

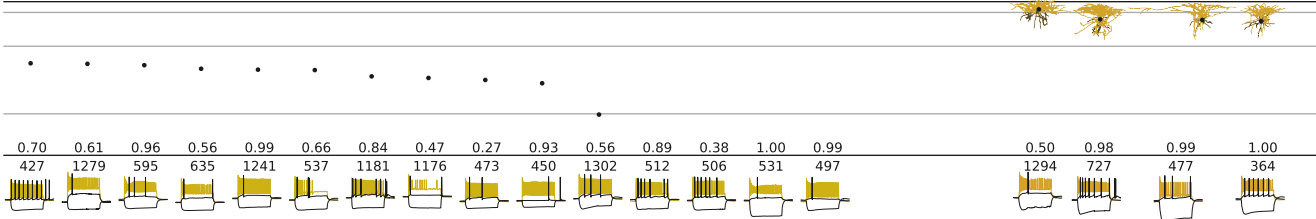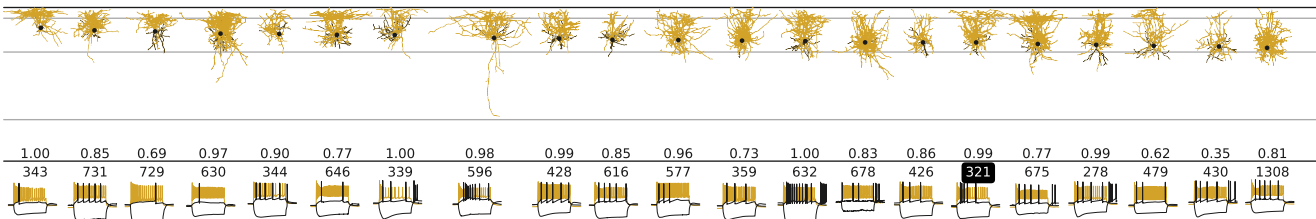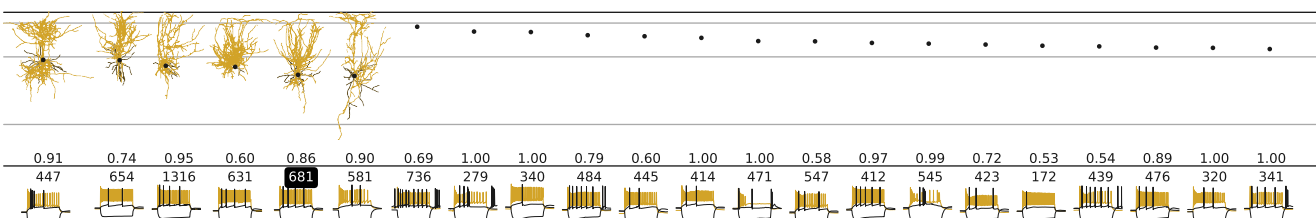

Sst Pvalb Calb2

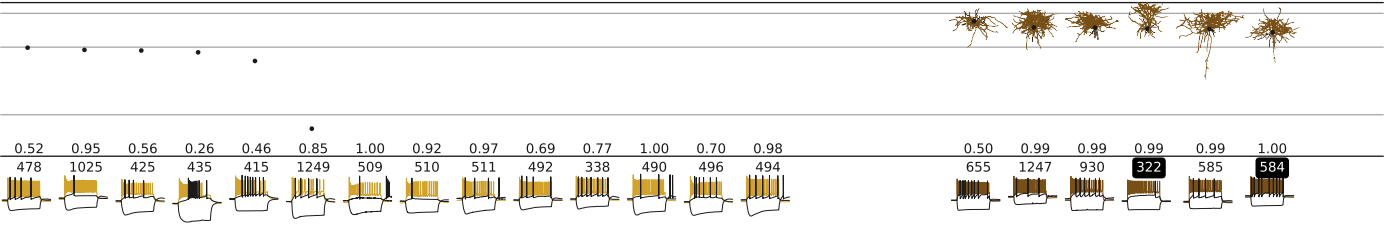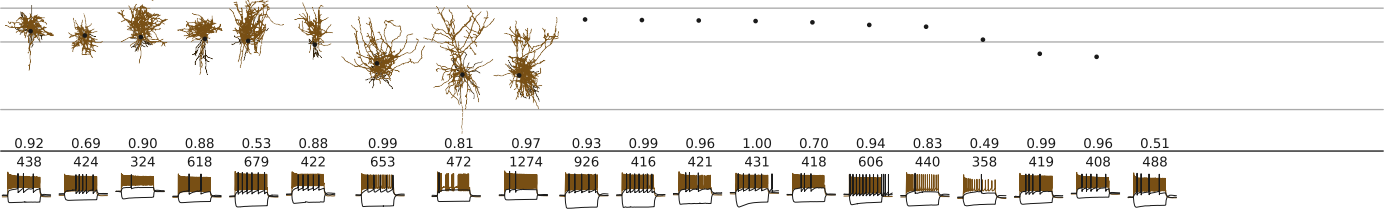

Sst C1ql3\_1

Sst C1ql3\_2

Sst Tac2

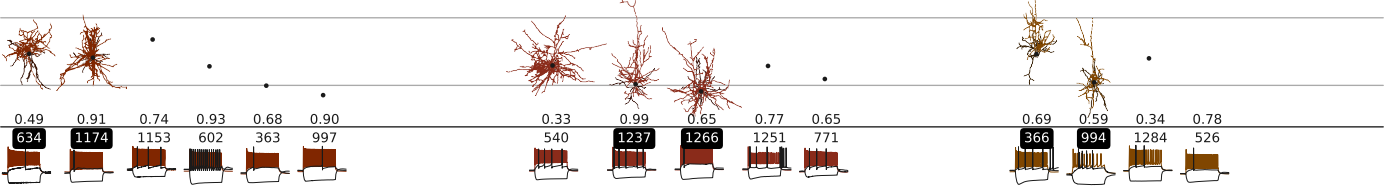

Sst Th\_1

Sst Th\_3

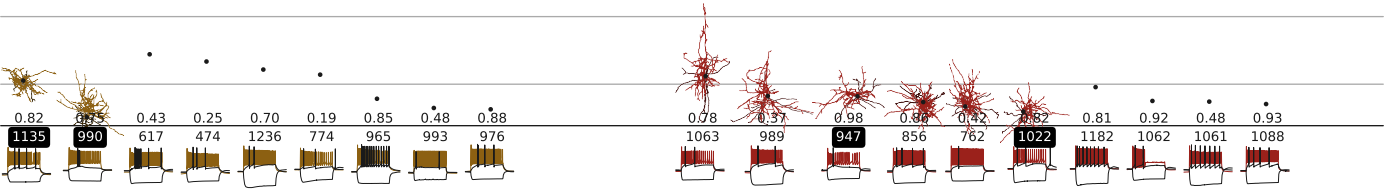

Pvalb Gabrg1

Pvalb Egfem1

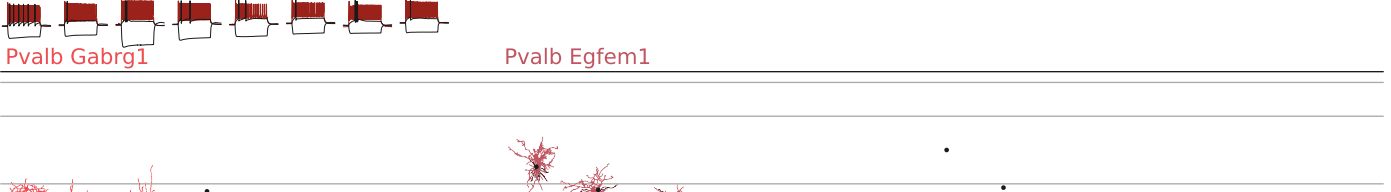

Pvalb Gpr149

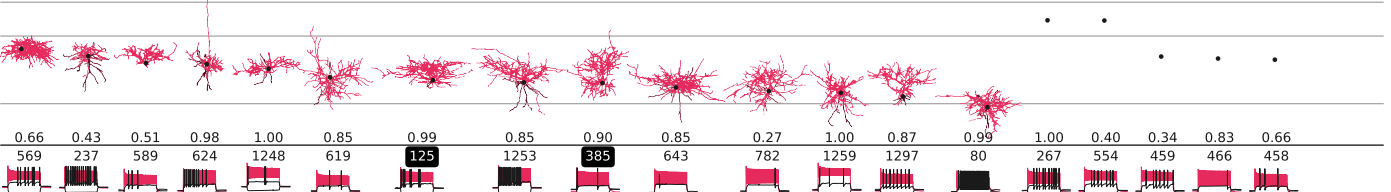

Pvalb Kank4

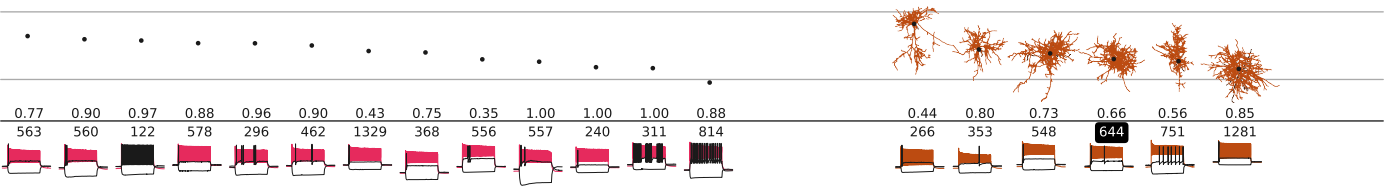

Pvalb Calb1\_1

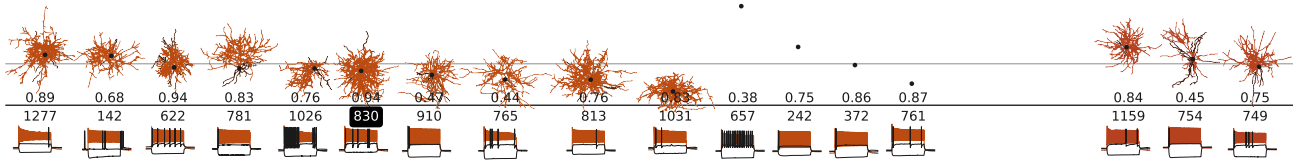

Pvalb Calb1\_2

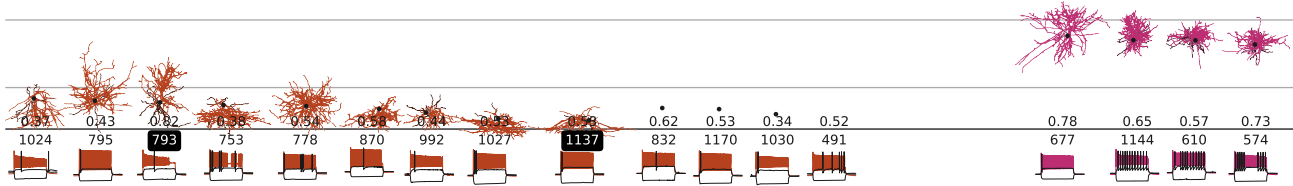

Pvalb Reln

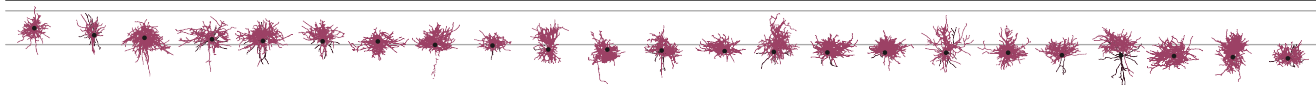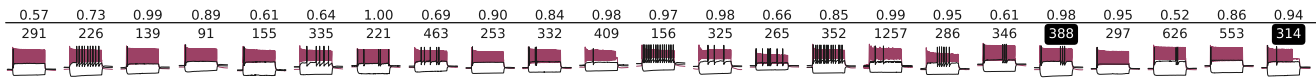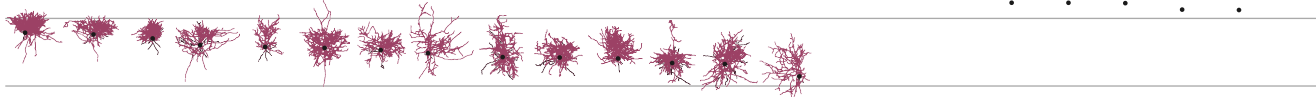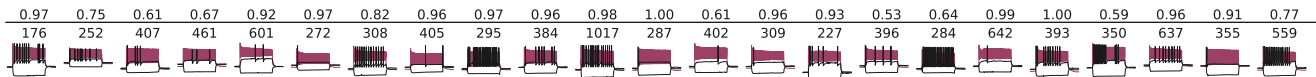

Pvalb Il1rap12

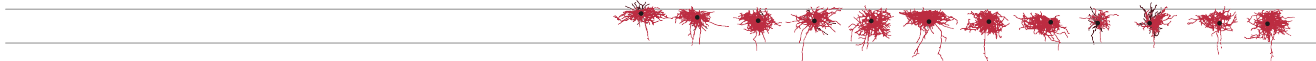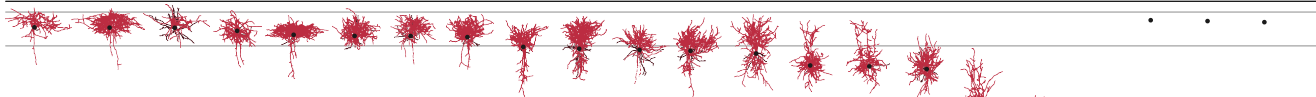



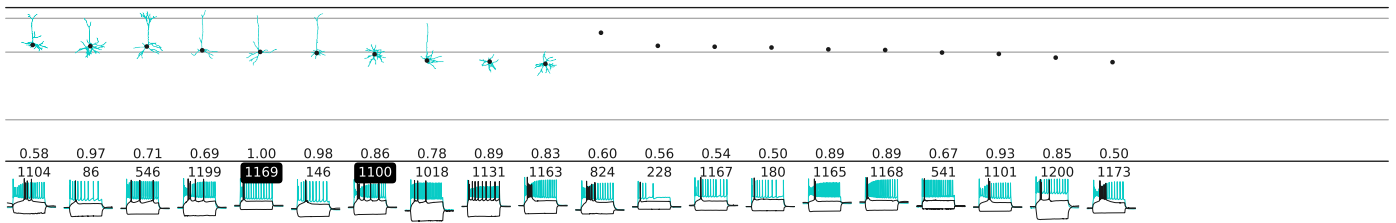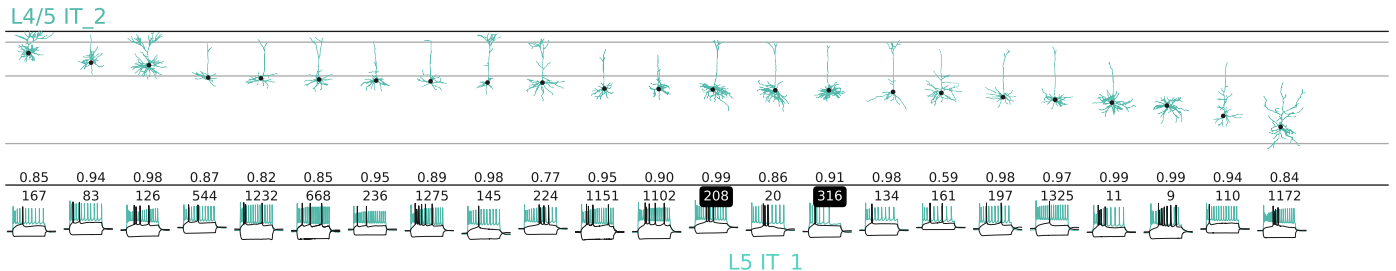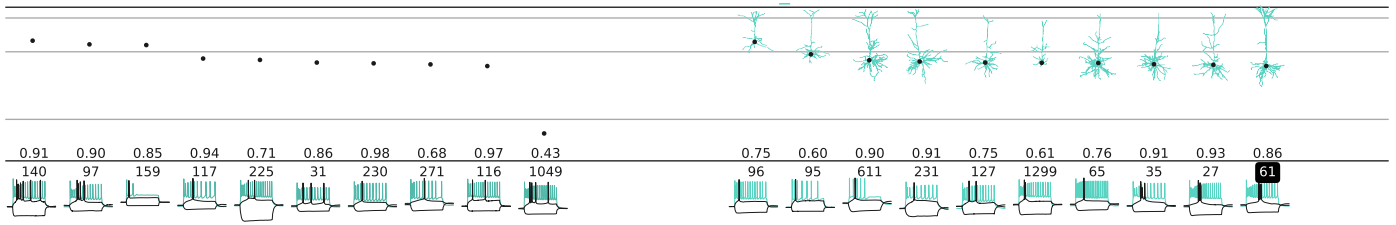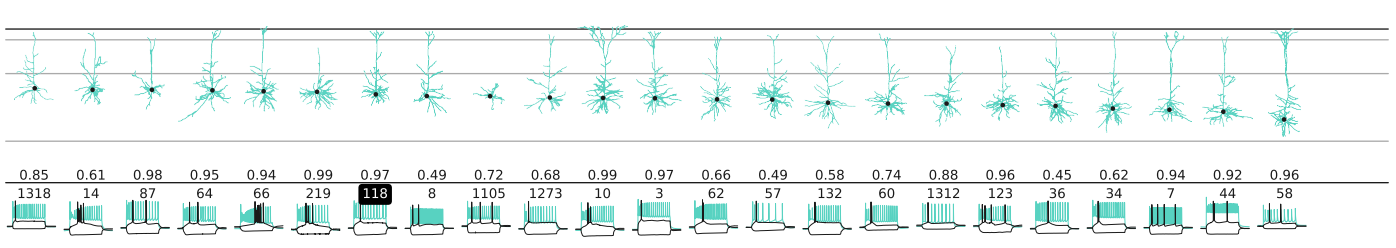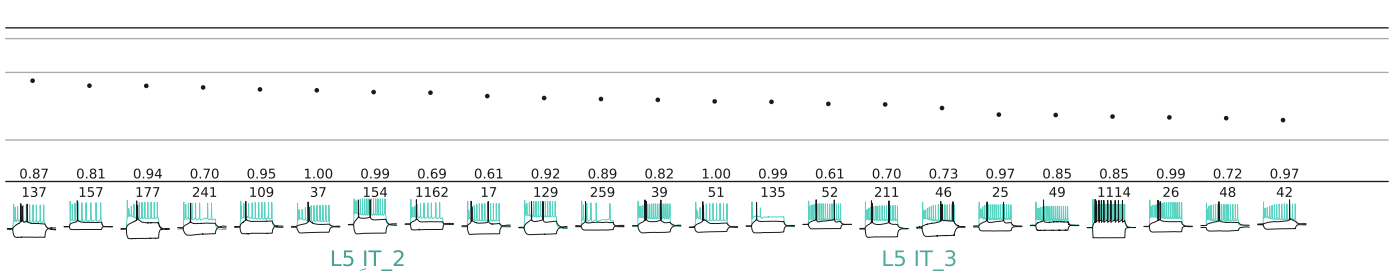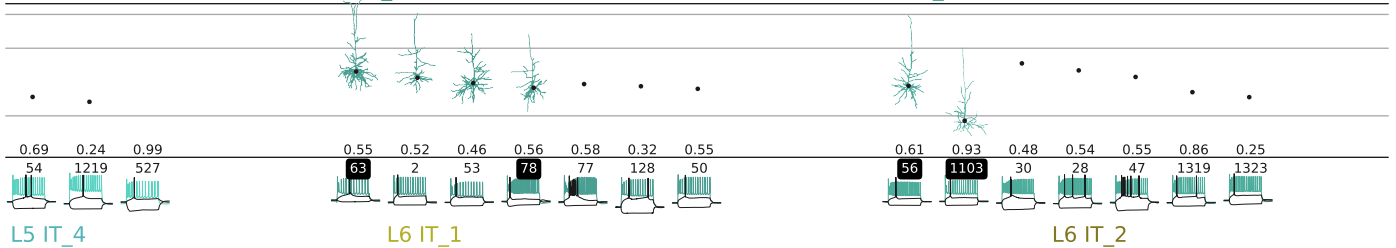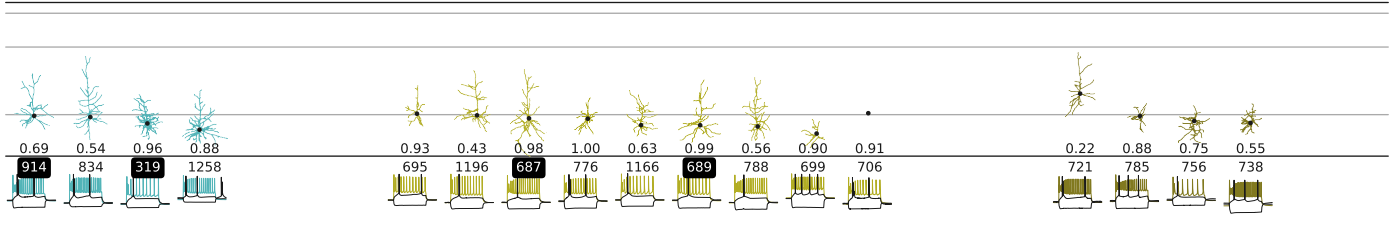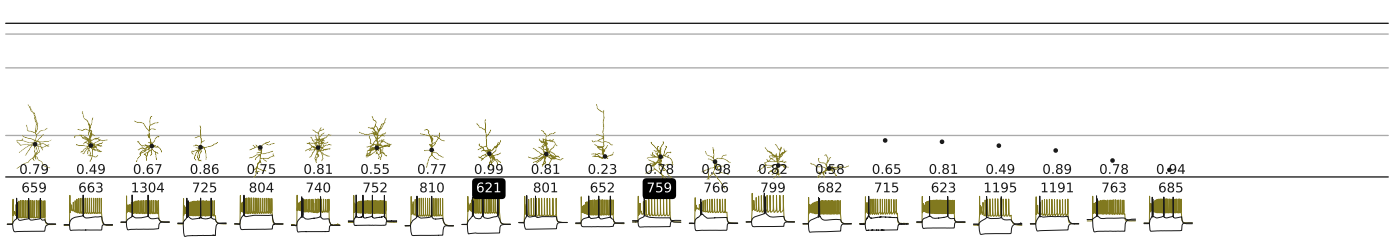



L5 ET\_1

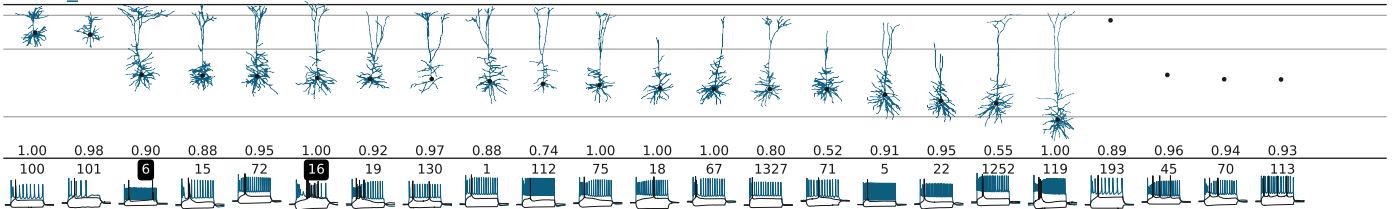

L5 ET\_2

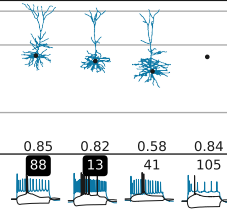

L5 ET\_3

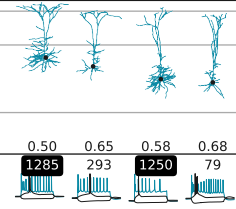

L5 ET\_4

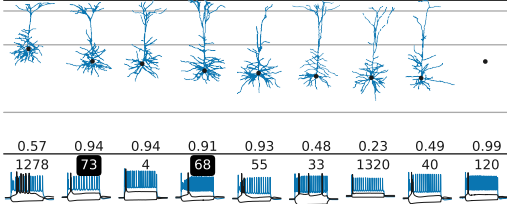

L5/6 NP\_1

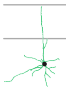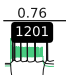

L6 CT Gpr139

L5/6 NP\_2

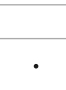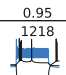

L6 CT Cpa6

L5/6 NP\_3

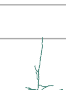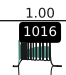

L5/6 NP CT

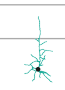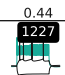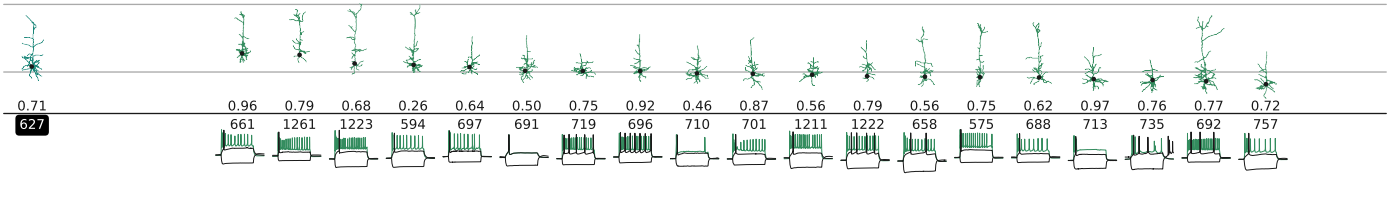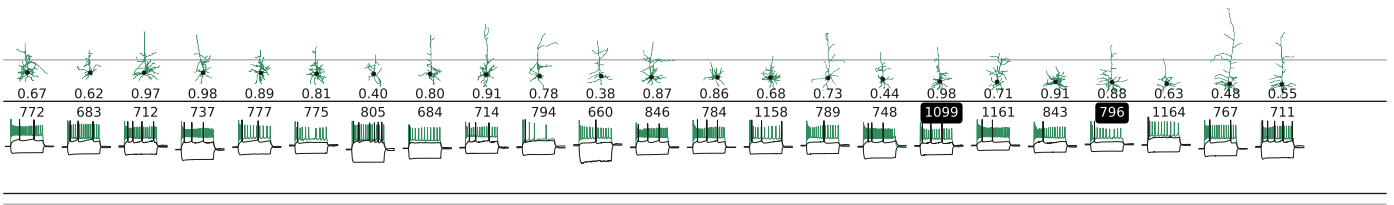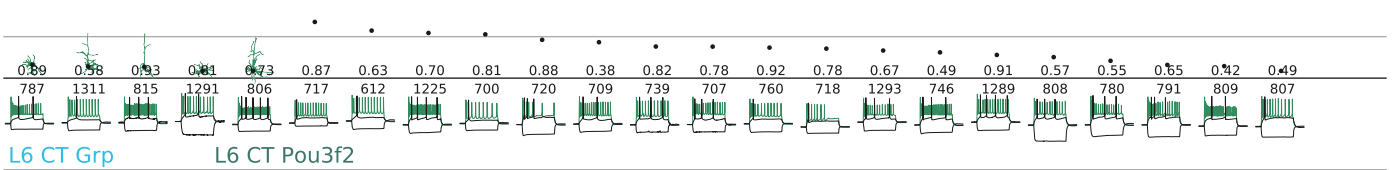

L6 CT Grp

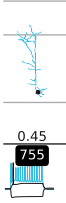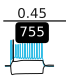

L6 CT Pou3f2

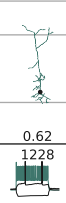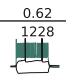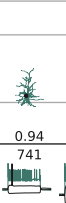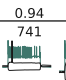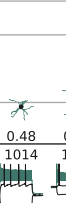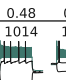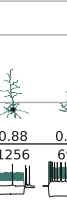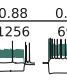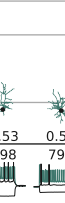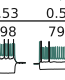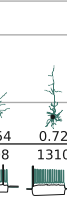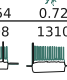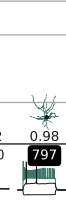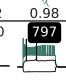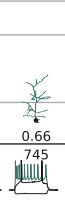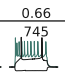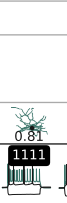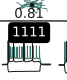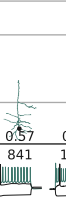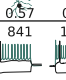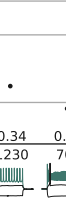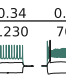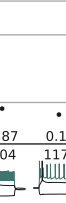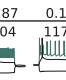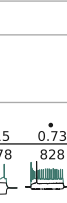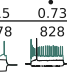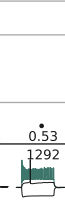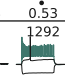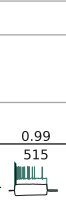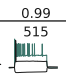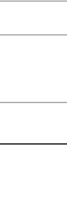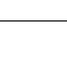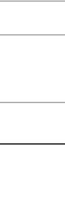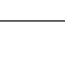

L6b Col6a1

L6b Shisa6\_1

L6b Shisa6\_2

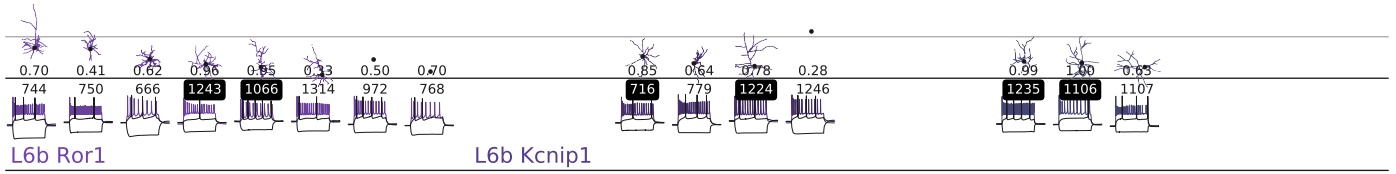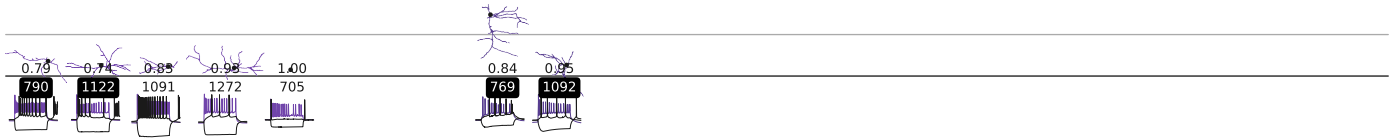

Supplement: 41586_2020_2907_MOESM1_ESM.pdf [file 41586_2020_2907_MOESM1_ESM.pdf]
