# Supplementary material
Source: PubMed Central journal article supplement (PMC8494644)
Supplement: 41586_2020_2907_MOESM4_ESM.pdf [file 41586_2020_2907_MOESM4_ESM.pdf]

| <b>Somatic Features</b>                                                  |                                                                                                                                                                                                                                                             |
|--------------------------------------------------------------------------|-------------------------------------------------------------------------------------------------------------------------------------------------------------------------------------------------------------------------------------------------------------|
| Normalized soma depth                                                    | Distance from pia to soma divided by the distance from pia to white matter (pia=0, wm=1).                                                                                                                                                                   |
| Soma radius                                                              | Radius of the sphere that approximates the soma ( $\mu\text{m}$ ).                                                                                                                                                                                          |
| <b>Shape Features</b>                                                    |                                                                                                                                                                                                                                                             |
| <i>Defined for the axon, dendrites, and apical dendrites</i>             |                                                                                                                                                                                                                                                             |
| Height                                                                   | Total extent in the $z$ direction ( $\mu\text{m}$ ).                                                                                                                                                                                                        |
| Robust height                                                            | The distance between the 2.5th and 97.5th percentiles of the $z$ coordinates across the whole point cloud ( $\mu\text{m}$ ).                                                                                                                                |
| Width                                                                    | Total extent in the $x$ direction ( $\mu\text{m}$ ).                                                                                                                                                                                                        |
| Robust width                                                             | The distance between the 2.5th and 97.5th percentiles of the $x$ coordinates across the whole point cloud ( $\mu\text{m}$ ).                                                                                                                                |
| Total length                                                             | Total path length across all neurites ( $\mu\text{m}$ ).                                                                                                                                                                                                    |
| Branch points                                                            | Total number of bifurcations.                                                                                                                                                                                                                               |
| <i>Defined for the axon and dendrites only</i>                           |                                                                                                                                                                                                                                                             |
| First bifurcation moment                                                 | The average bifurcation position in the $z$ direction, relative to the soma ( $\mu\text{m}$ ).                                                                                                                                                              |
| Bifurcation standard deviation                                           | The standard deviation of the bifurcation positions in the $z$ direction ( $\mu\text{m}$ ).                                                                                                                                                                 |
| Max branch order                                                         | The maximum number of bifurcations passed when tracing a neurite from the tip back to the soma. Branch ordering starts with the soma having branch order 0 and each subsequent bifurcation increases the order by 1.                                        |
| Tips                                                                     | The number of end-points.                                                                                                                                                                                                                                   |
| Max Euclidean distance to soma                                           | Euclidean distance between the soma and the most distal node ( $\mu\text{m}$ ).                                                                                                                                                                             |
| Max path distance to soma                                                | Total path length of the longest neurite from its tip to the soma ( $\mu\text{m}$ ).                                                                                                                                                                        |
| Max segment length                                                       | Path length of the longest segment between the two neighbouring bifurcations ( $\mu\text{m}$ ).                                                                                                                                                             |
| Mean neurite radius                                                      | The average radius across all neurites ( $\mu\text{m}$ ).                                                                                                                                                                                                   |
| Fraction above soma                                                      | Fraction of nodes above the soma, i.e. closer to the pia.                                                                                                                                                                                                   |
| X-bias                                                                   | The absolute difference between $x$ -extents to the left and to the right of the soma ( $\mu\text{m}$ ).                                                                                                                                                    |
| Z-bias                                                                   | The difference between $z$ -extents above and below the soma ( $\mu\text{m}$ ).                                                                                                                                                                             |
| Max/Mean/Min branch angle                                                | Maximal/average/minimal branch angle at each bifurcation. A branch angle denotes the angle between the subsequent neurites at a furcation point.                                                                                                            |
| Log max/median/min tortuosity                                            | Log-transformed 99.5th percentile/median/minimal tortuosity across all segments. Tortuosity describes the "bendiness" of a segment and is defined as the ratio of the segment path length to the Euclidean distance between its ends.                       |
| Max/Median path angle                                                    | 99.5th percentile and median across all path angles. A path angle describes the angle between two consecutive sub-segments (1-micron-long each) along the path between the two adjacent bifurcation points. Can take values in the $[0, 180)$ degree range. |
| <i>Defined for dendrites only</i>                                        |                                                                                                                                                                                                                                                             |
| Stems                                                                    | Number of neurites extending directly from the soma.                                                                                                                                                                                                        |
| Stems exiting up/down/to the sides                                       | Fraction of stems exiting into the three directions. The direction of a stem is determined by its angle w.r.t. the normal pointing towards the pia. Up: below 45 degrees, down: above 135 degrees, sides: 45–135 degrees.                                   |
| <i>Defined for the apical dendrite only</i>                              |                                                                                                                                                                                                                                                             |
| Mean bifurcation distance                                                | The average position of bifurcations projected onto a line connecting the soma to the furthest node, normalized by the total path length. The furthest node is defined in terms of the path length. Takes values in the $(0, 1)$ range.                     |
| Bifurcation distance standard deviation                                  | Standard deviation of the normalized bifurcation positions (see above).                                                                                                                                                                                     |
| Log <sub>1p</sub> number of outer bifurcations                           | The number of bifurcations with Euclidean distance to the soma above 0.5 of the maximal Euclidean distance to the soma. This feature was $\log(x + 1)$ -transformed.                                                                                        |
| <i>Defined for axon only</i>                                             |                                                                                                                                                                                                                                                             |
| Mean initial segment radius                                              | The average radius of the first axonal segment leaving the soma ( $\mu\text{m}$ ).                                                                                                                                                                          |
| <b>Overlap Features (only inhibitory cells)</b>                          |                                                                                                                                                                                                                                                             |
| EMD axon dendrite                                                        | Earth mover's distance (also known as the Wasserstein distance) calculated between the normalized $z$ -profile 20-bin histograms of axon and dendrite. We used the implementation from the <code>scipy</code> library.                                      |
| Log <sub>1p</sub> fraction of axon above/below dendrite                  | Fraction of axonal nodes above/below the full $z$ -extent of the dendrites. This feature was $\log(x + 1)$ -transformed.                                                                                                                                    |
| Log <sub>1p</sub> fraction of dendrite above/below axon                  | (see above).                                                                                                                                                                                                                                                |
| <b>Excluded Features</b>                                                 |                                                                                                                                                                                                                                                             |
| <i>Based on small coefficient of variation: <math>CV &lt; .25</math></i> |                                                                                                                                                                                                                                                             |
| Excitatory cells                                                         | dendrite above soma, dendrite max branch angle, dendrite max path angle, dendrite mean branch angle, dendrite log median tortuosity                                                                                                                         |
| Inhibitory cells                                                         | axon max/mean branch angle, axon max/median path angle, dendrite mean branch angle, dendrite max/median path angle, axon log max/median tortuosity                                                                                                          |
| <i>Based on visual inspection</i>                                        |                                                                                                                                                                                                                                                             |
| Inhibitory cells                                                         | Log <sub>1p</sub> fraction of dendrite below axon, dendrite min/max branch angle                                                                                                                                                                            |
